# Supplementary material for: Association of Diabetic Retinopathy and Diabetic Kidney Disease With All-Cause and Cardiovascular Mortality in a Multiethnic Asian Population
Source: PubMed Central journal article supplement (PMC6450319; doi:10.1001/jamanetworkopen.2019.1540), 2019-03-29
Supplement: jamanetwopen-2-e191540-s001.pdf [file jamanetwopen-2-e191540-s001.pdf]

## Supplementary Online Content

Sabanayagam C, Chee ML, Banu R, et al. Association of diabetic retinopathy and diabetic kidney disease with all-cause and cardiovascular mortality in a multiethnic Asian population. *JAMA Netw Open*. 2019;2(3):e191540. doi:10.1001/jamanetworkopen.2019.1540

**eTable 1.** Baseline Characteristics of SEED Participants Across the 4 Disease Groups

**eTable 2.** Association of Risk Factors With All-Cause and CVD Mortality (Joint Effect of DR and DKD Model)

This supplementary material has been provided by the authors to give readers additional information about their work.

| <b>eTable 1. Baseline characteristics of SEED participants across the 4 disease groups</b> |                                      |                             |                              |                                    |          |
|--------------------------------------------------------------------------------------------|--------------------------------------|-----------------------------|------------------------------|------------------------------------|----------|
| <b>Characteristics</b>                                                                     | <b>No DR and no DKD<br/>(n=1633)</b> | <b>DR alone<br/>(n=584)</b> | <b>DKD alone<br/>(n=327)</b> | <b>Both DR and DKD<br/>(n=231)</b> | <b>P</b> |
| Age (years), mean SD                                                                       | 59.9 (9.9)                           | 59.9 (9.0)                  | 69.0 (8.0)                   | 66.3 (7.8)                         | <0.001   |
| Gender, female                                                                             | 802 (49.1)                           | 278 (47.6)                  | 150 (45.9)                   | 126 (54.5)                         | 0.206    |
| Primary/below education, %                                                                 | 1038 (63.8)                          | 414 (71.1)                  | 270 (82.8)                   | 195 (84.8)                         | <0.001   |
| Current smoker, %                                                                          | 256 (15.7)                           | 80 (13.7)                   | 31 (9.6)                     | 17 (7.4)                           | <0.001   |
| Ever drinking , %                                                                          | 129 (7.9)                            | 64 (11.0)                   | 12 (3.7)                     | 3 (1.3)                            | <0.001   |
| Duration of diabetes (years)                                                               | 4.8 (7.1)                            | 11.2 (9.8)                  | 7.3 (8.9)                    | 14.4 (10.3)                        | <0.001   |
| Anti-diabetic medication use, %                                                            | 831 (51.8)                           | 450 (79.2)                  | 194 (60.4)                   | 184 (81.4)                         | <0.001   |
| Hypertension, %                                                                            | 1157 (71.1)                          | 450 (77.2)                  | 295 (90.5)                   | 215 (93.1)                         | <0.001   |
| History of cardiovascular disease, %                                                       | 242 (14.9)                           | 105 (18.1)                  | 95 (29.2)                    | 78 (33.9)                          | <0.001   |
| Body mass index (kg/m <sup>2</sup> )                                                       | 27.1 (4.8)                           | 26.3 (4.5)                  | 27.2 (4.8)                   | 26.9 (5.2)                         | 0.003    |
| Systolic blood pressure (mmHg)                                                             | 142.3 (20.1)                         | 146.7 (22.2)                | 149.3 (23.4)                 | 156.2 (25.5)                       | <0.001   |
| Diastolic blood pressure (mmHg)                                                            | 78.6 (10.2)                          | 78.1 (10.5)                 | 77.2 (10.4)                  | 76.9 (12.0)                        | 0.027    |
| Random blood glucose (mg/dl )                                                              | 167.4 (75.6)                         | 203.4 (102.6)               | 163.8 (77.4)                 | 196.2 (102.6)                      | <0.001   |
| HbA1c, %                                                                                   | 7.5 (1.6)                            | 8.3 (1.9)                   | 7.4 (1.5)                    | 8.1 (1.8)                          | <0.001   |
| Serum total cholesterol (mg/dl)                                                            | 201.1 (46.4)                         | 193.3 (50.3)                | 201.1 (50.3)                 | 197.2 (58.0)                       | 0.049    |
| Serum HDL cholesterol (mg/dl)                                                              | 42.5 (11.6)                          | 42.5 (11.6)                 | 46.4 (11.6)                  | 46.4 (15.5)                        | 0.20     |
| eGFR (mL/min/1.73 m <sup>2</sup> ) include category as well,(<60, 30-60, 30)               | 87.6 (14.7)                          | 88.1 (17.1)                 | 46.2 (12.0)                  | 41.5 (14.0)                        | <0.001   |
| <b>eGFR stage</b>                                                                          |                                      |                             |                              |                                    |          |
| eGFR >60ml/min/1.73m <sup>2</sup>                                                          | 1633 (100.0)                         | 584 (100.0)                 | 0 (0.0)                      | 0 (0)                              | <0.001   |

|                                                                                                                                                         |              |            |             |            |        |
|---------------------------------------------------------------------------------------------------------------------------------------------------------|--------------|------------|-------------|------------|--------|
| eGFR 45-60                                                                                                                                              | 0 (0.0)      | 0 (0.0)    | 205 (62.7)  | 114 (49.4) |        |
| eGFR 30-45                                                                                                                                              | 0 (0.0)      | 0 (0.0)    | 84 (25.7)   | 70 (30.3)  |        |
| eGFR < 30                                                                                                                                               | 0 (0.0)      | 0 (0.0)    | 38 (11.6)   | 47 (20.3)  |        |
| Heart attack (self-reported history)                                                                                                                    | 154 (9.4)    | 55 (9.5)   | 60 (18.5)   | 59 (25.7)  | <0.001 |
| <b>DR severity</b>                                                                                                                                      |              |            |             |            |        |
| None                                                                                                                                                    | 1633 (100.0) | 0 (0.0)    | 327 (100.0) | 0 (0)      | <0.001 |
| Minimal/ Mild                                                                                                                                           | 0 (0.0)      | 399 (68.3) | 0 (0.0)     | 110 (47.6) |        |
| Moderate                                                                                                                                                | 0 (0.0)      | 116 (19.9) | 0 (0.0)     | 51 (22.1)  |        |
| Severe/ PDR                                                                                                                                             | 0 (0.0)      | 69 (11.8)  | 0 (0.0)     | 70 (30.3)  |        |
| Data presented are frequency (percentage) or mean (standard deviation) as appropriate<br>P<0.0001 for all variables except random blood glucose (p=0.6) |              |            |             |            |        |

| <b>eTable 2. Association of risk factors with all-cause and CVD mortality (Joint effect of DR and DKD model)</b> |                            |                       |
|------------------------------------------------------------------------------------------------------------------|----------------------------|-----------------------|
| <b>Characteristics</b>                                                                                           | <b>All-cause mortality</b> | <b>CVD mortality</b>  |
|                                                                                                                  | <b>Multivariable*</b>      | <b>Multivariable*</b> |
|                                                                                                                  | <b>HR (95% CI)</b>         | <b>HR (95% CI)</b>    |
| <b>Joint effect of DR and DKD</b>                                                                                |                            |                       |
| No DR and no DKD                                                                                                 | Reference                  | Reference             |
| DR alone                                                                                                         | 1.38 (1.03 – 1.86)         | 1.64 (1.06 – 2.56)    |
| DKD alone                                                                                                        | 1.89 (1.40 – 2.57)         | 2.26 (1.42 – 3.61)    |
| Both DR and DKD                                                                                                  | 2.76 (2.05 – 3.72)         | 3.41 (2.19 – 5.32)    |
| Age, per year                                                                                                    | 1.07 (1.05 – 1.08)         | 1.06 (1.03 – 1.08)    |
| Gender, female                                                                                                   | 0.59 (0.47 – 0.76)         | 0.62 (0.43 – 0.89)    |
| <b>Ethnicity</b>                                                                                                 |                            |                       |
| Malay                                                                                                            | Reference                  | Reference             |
| Indian                                                                                                           | 0.75 (0.57 – 0.99)         | 0.81 (0.54 – 1.21)    |
| Chinese                                                                                                          | 0.80 (0.56 – 1.16)         | 0.83 (0.48 – 1.43)    |
| Primary/below education                                                                                          | 1.21 (0.91 – 1.61)         | 1.05 (0.70 – 1.56)    |
| History of cardiovascular disease                                                                                | 1.52 (1.21 – 1.91)         | 2.54 (1.85 – 3.48)    |
| Current smoking                                                                                                  | 1.11 (0.79 – 1.55)         | 0.90 (0.53 – 1.53)    |
| Alcohol consumption                                                                                              | 1.07 (0.70 – 1.66)         | 0.93 (0.48 -1.78)     |
| Body mass index (kg/m <sup>2</sup> )                                                                             | 1.00 (0.98 – 1.03)         | 1.00 (0.96 – 1.03)    |
| Hypertension                                                                                                     | 0.97 (0.71 – 1.32)         | 0.97 (0.62 – 1.54)    |
| Serum total cholesterol (mmol/L)                                                                                 | 1.10 (1.00 – 1.20)         | 1.01 (0.88 – 1.17)    |
| Serum HDL cholesterol (mmol/L)                                                                                   | 0.96 (0.68 – 1.36)         | 1.01 (0.60 -1.70)     |
| HbA1c, %                                                                                                         | 1.09 (1.02 – 1.16)         | 1.17 (1.06 – 1.28)    |

|                            |                    |                    |
|----------------------------|--------------------|--------------------|
| Duration of diabetes, year | 1.00 (0.99 – 1.02) | 1.01 (0.99 – 1.02) |
|----------------------------|--------------------|--------------------|
